# Supplementary material for: Establishment of environmentally sensitive DNA methylation states in the very early human embryo
Source: PubMed Central journal article supplement (PMC6040841; doi:10.1126/sciadv.aat2624), 2018-07-11
Supplement: aat2624_SM.pdf [file aat2624_SM.pdf]

## Supplementary Materials for

### **Establishment of environmentally sensitive DNA methylation states in the very early human embryo**

Noah J. Kessler, Robert A. Waterland, Andrew M. Prentice, Matt J. Silver\*

\*Corresponding author. Email: [matt.silver@lshtm.ac.uk](mailto:matt.silver@lshtm.ac.uk)

Published 11 July 2018, *Sci. Adv.* **4**, eaat2624 (2018)

DOI: 10.1126/sciadv.aat2624

#### **The PDF file includes:**

Fig. S1. ME and control region sizes, and Guo *et al.* methylome coverage.

Fig. S2. Mean methylation at MEs and clustered control regions assayed by Guo *et al.*

Fig. S3. Mean methylation at all CpGs and at MEs and clustered control regions assayed by Zhu *et al.* (21).

Fig. S4. Methylation dynamics at the ICM-to-embryonic liver transition.

Fig. S5. ME background comparisons in other fetal tissues, and methylation in control clusters.

#### **Other Supplementary Material for this manuscript includes the following:**

(available at [advances.sciencemag.org/cgi/content/full/4/7/eaat2624/DC1](https://advances.sciencemag.org/cgi/content/full/4/7/eaat2624/DC1))

Table S1. MEs identified in genome-wide screen.

Table S2. Enrichment of proximal genomic features in MEs.

Table S3. Number of CpGs covered in each replicate of RRBS data from Guo *et al.*

Table S4. Size of ME and control regions, and their coverage in Guo *et al.* RRBS data.

Table S5. Overlap of Bak *et al.* (28) ZFP57-mutant DMRs with MEs.

## Supplementary Material

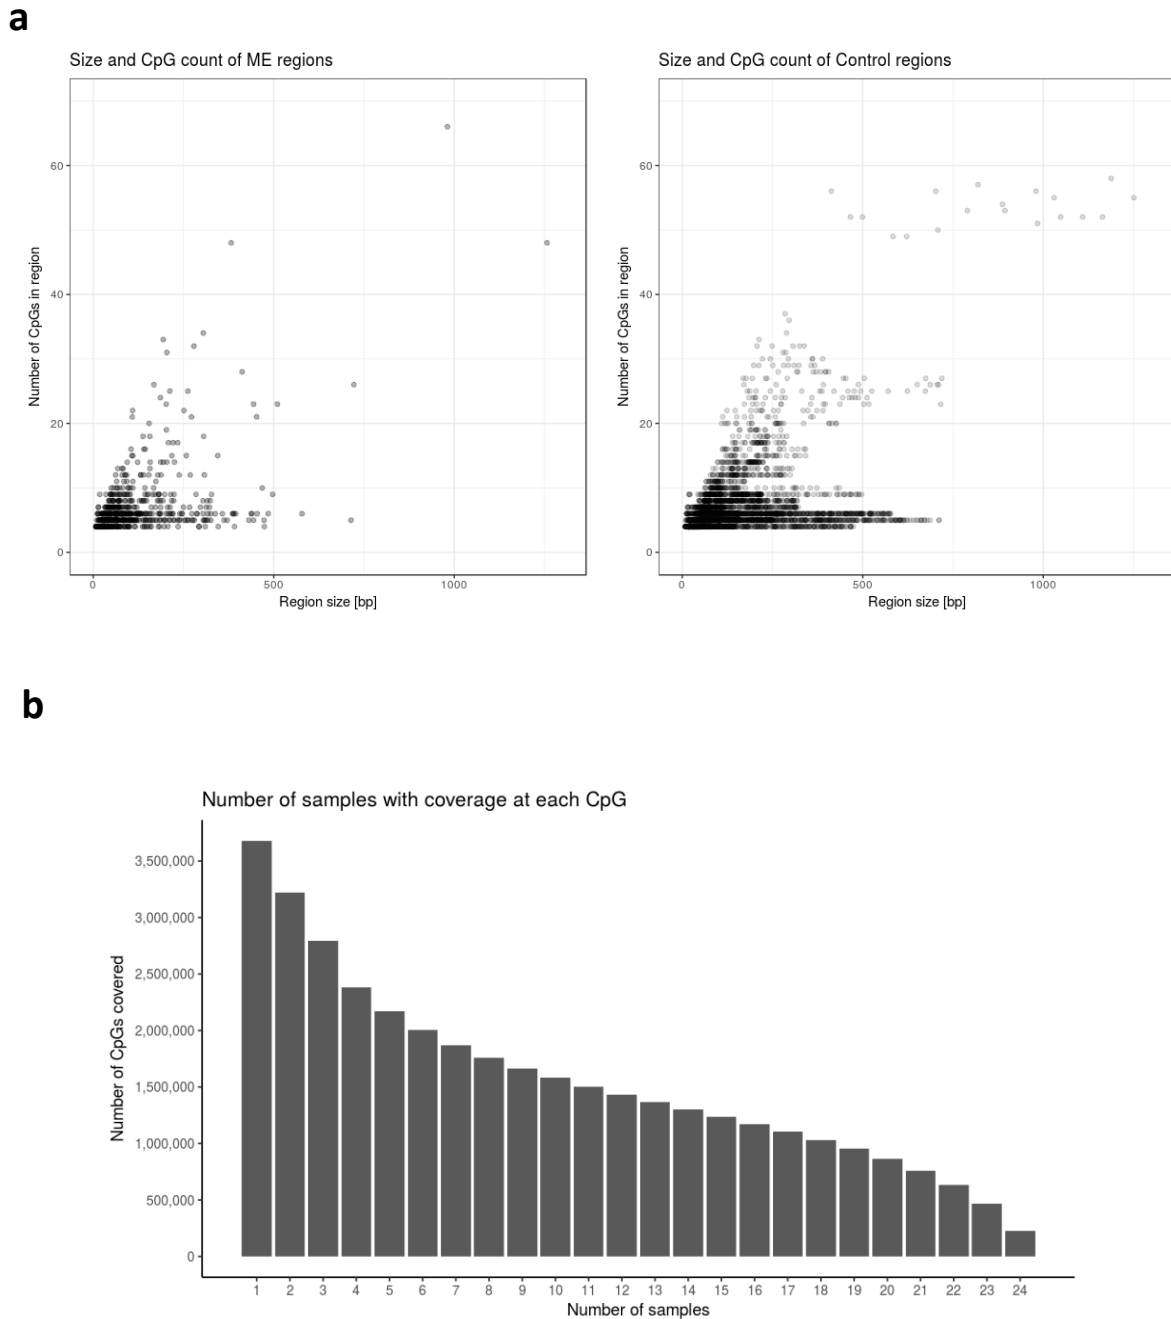

**Fig. S1. ME and control region sizes, and Guo *et al.* methylome coverage. (A)**, The joint distribution of region size and number of CpGs in each region was approximated in creating the set of control regions. One outlier ME region of size >1500 bp is not shown. **(B)**, Methylome coverage within Guo *et al.* samples. Bars represent the number of CpGs (y-axis) covered by at least the number of samples shown on the x-axis.

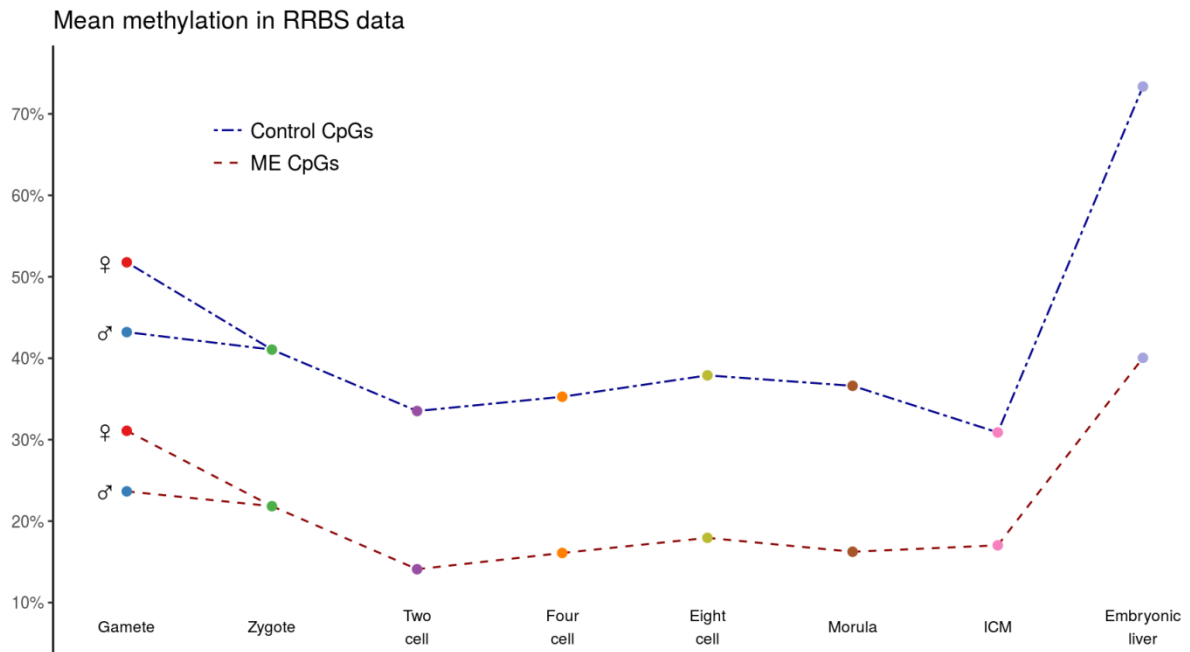

**Fig. S2. Mean methylation at MEs and clustered control regions assayed by Guo *et al.*** CpGs are counted once for each replicate for which there was sufficient read depth at each developmental stage. Dashed line: mean methylation in clustered control regions (n=1,184 regions; 6,975 CpGs); dashed line: mean methylation at ME regions covered by RRBS (n=302 regions; 2,098 CpGs).

Mean methylation in Zhu et al. data

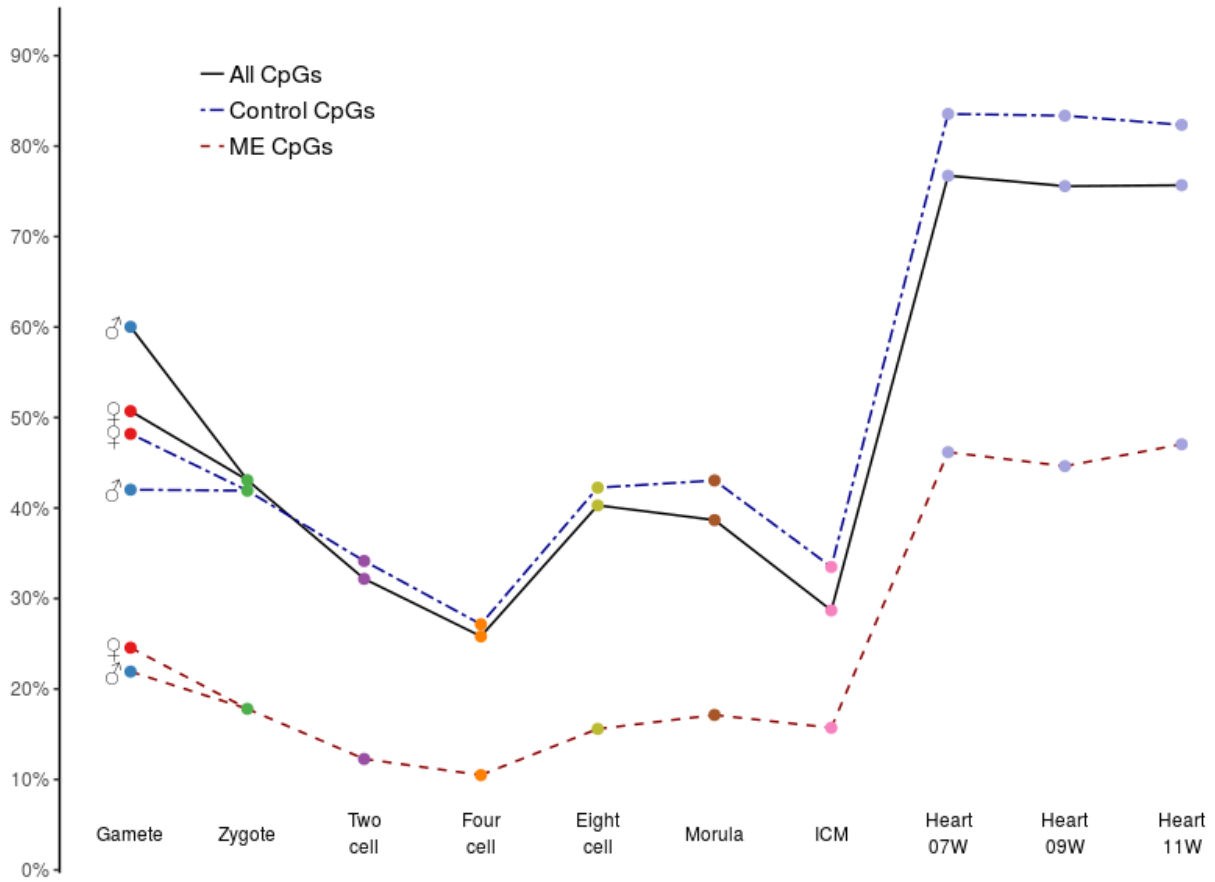

**Fig. S3. Mean methylation at all CpGs and at MEs and clustered control regions assayed by Zhu *et al.* (21).** Each CpG is counted once regardless of the number of samples/replicates which had reads overlapping it. Maximum number of CpGs with 10x coverage at any time point: 26,359,279 (All CpGs), 4,969 (MEs), 38,120 (Controls).

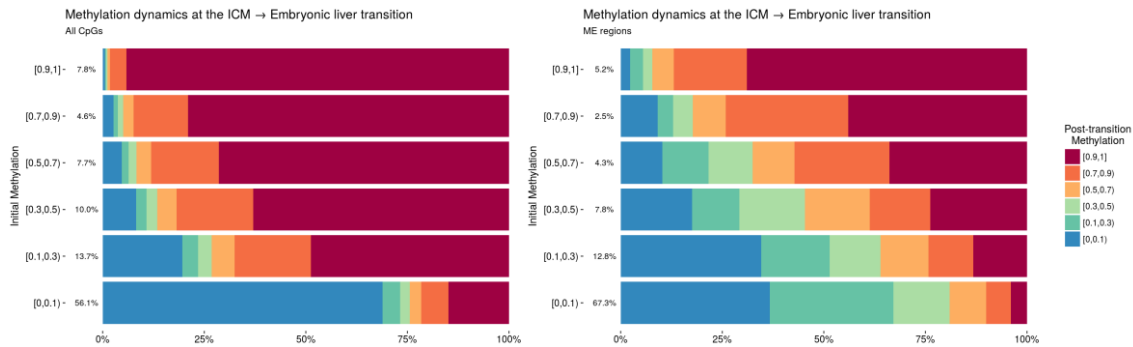

**Fig. S4. Methylation dynamics at the ICM-to-embryonic liver transition. a,** Same data as Figure 3, but in a two-dimensional format. The y-axis represents the methylation level in ICM. The proportion of CpGs within each of the six methylation ranges in ICM is given next to the bars. The x-axis represents the distribution of ending (embryonic liver) methylation of all sites from each starting methylation category.

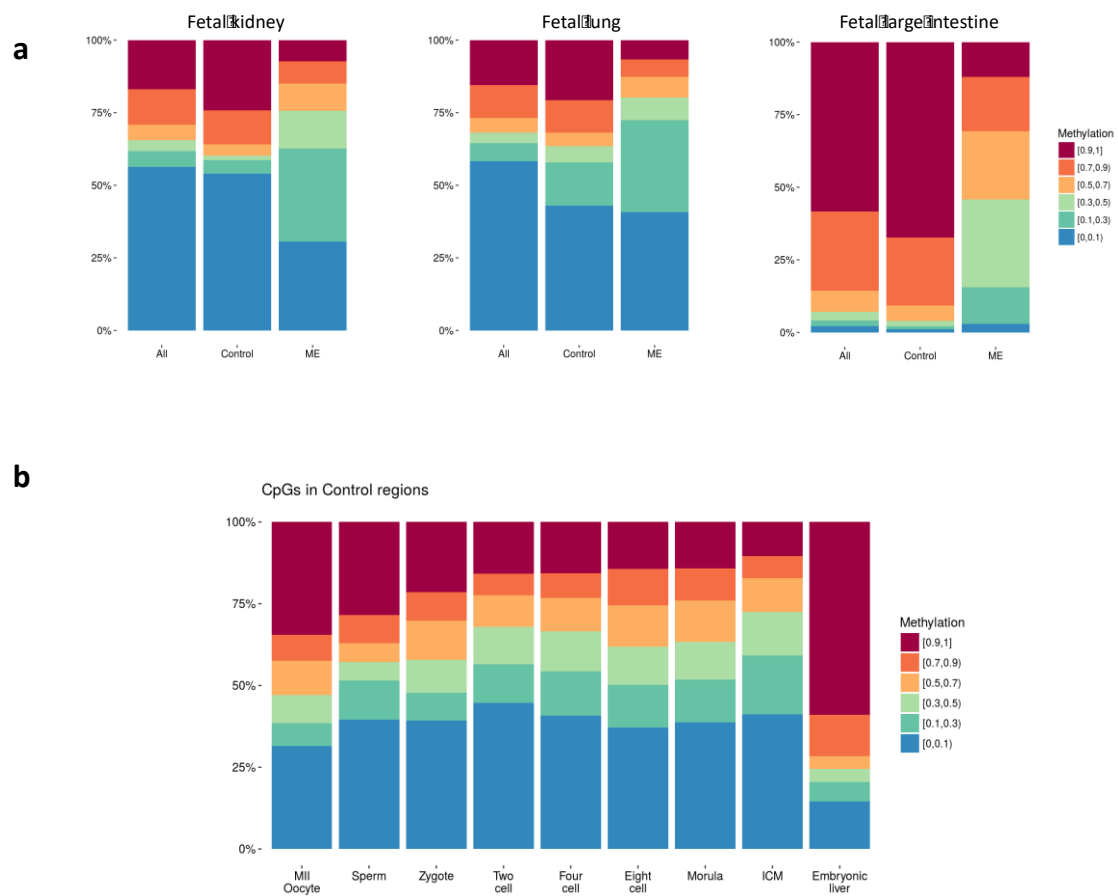

**Fig. S5. ME background comparisons in other fetal tissues, and methylation in control clusters. (A),** Methylation distribution in all CpGs, control regions, and ME regions in Roadmap fetal tissues: kidney (E086, RRBS); lung (E088, RRBS); and large intestine (E084, WGBS). Note that the WGBS sample has a much different distribution of methylation in genomic background compared to the RRBS datasets, but still shows an extreme enrichment for intermediate methylation in ME regions. **(B),** Distribution of methylation within control regions.
